# Supplementary material
Source: publisher site journal article supplement (https://www.dovepress.com/article/443908)
Supplement: Supplementary file 1 [file get_supplementary_file.php]

**Supplemental Material**

1. Detailed protocols of the comprehensive PBM program…………..………………...2
2. Quality management methods of the comprehensive PBM program…………...….4
3. Complication events definitions….…………….……………………………..………..5
4. Supplemental Table S1………………………..………………………………………...6
5. **Detailed protocols of the comprehensive PBM program**

- The indications of the restrictive RBC transfusion were as follows: (1) hemoglobin during CPB was lower than 70 g/L, (2) hemoglobin was still below 80 g/L after ultrafiltration or reinfusion of residual pump blood and washed RBC, (3) hemoglobin was less than 90 g/L after ultrafiltration or reinfusion of residual pump blood and washed RBC for patients who were over 70 years or underwent aortic surgery, (4) although hemoglobin was less than 70 g/L, it is estimated to reach or exceed 80 g/L at the time of weaning after ultrafiltration, RBC would not be transfused during CPB.
- Conventional ultrafiltration: If it is estimated that the remaining blood in the reservoir exceeds 1000ml after the conclusion of CPB, we then utilize conventional ultrafiltration before weaning of CPB. A hemoconcentrator was placed with its inlet connected to the arterial line and outlet to the venous, keeping the maximum flow rate limited at 500 mL/min, until Hct level reached 0.24 l/L.
- Cell salvage: Intraoperative cell salvage was used routinely in post-management patients. Besides blood suctioned from the surgical field, washing liquid of blood-stained gauzes intraoperatively was collected into cell salvage. Washed RBC was collected in an infusion bag and reinfused to patients in ICU within four hours.
- Residual pump blood ultrafiltration before reinfusion: It is primarily to address volume overload issues. After the conclusion of CPB, residual pump blood was ultrafiltrated with hemoconcentrator until the level reached 0ml in the reservoir. Then it was reinfused via aortic cannula as required by the anesthetists according to the patients’ volume status and cardiac function.
- The modified-MECC system: Our modified-MECC system was composed of a shortened circuit, roller pump, reservoir, oxygenator with arterial filter, vacuum-assist venous drainage (VAVD) device and microplegia. It was used in patients with small body size (weight less than 60 kg), a high possibility of preoperative anemia and less estimated operating time (less than three hours). The tubing length was 342 cm and primed with 750 mL. Microplegia was given at 4℃ with a 35:1 blood mixture with potassium ion concentration 600 mmol/L. VAVD was used to assist venous drainage in the modified-MECC system, the negative pressure was controlled at -20 to -40 mmHg and adjusted as necessary in the system, reducing the altitude difference between the reservoir and the patients with a decreased tubing length to reduce priming.

1. **Quality management methods of the comprehensive PBM program**

- We regarded blood transfusion as an important indicator in clinical quality evaluation and emphasized the significance of blood conservation at every weekly seminar.
- We summarized the transfusion data every 3 months, and the results were sent to each perfusionist by email. This allowed them to make a vertical comparison with their previous performance and a horizontal comparison with the average level of the whole department, then improve and adjust their transfusion practice.
- Perfusionists who were most compliant with the policy were set as a model for others to learn from, whereas noncompliant perfusionists were required to receive extra training, expecting that the team would eventually reach consensus in transfusion practice.
- Questionnaires were randomly distributed to clinicians in the surgery team, anesthesiology, and intensive care unit (ICU) at the end of the year to collect feedback on the effect of the blood conservation program and improve our management in time.

1. **Complication events definitions**

- Combined complications: defined as the occurrence of one or more of complications of prolonged mechanical ventilation, cerebrovascular accident, AKI, excessive chest drainage, pulmonary infection and IABP insertion.
- Myocardial infarction (MI): defined as a serum cTnI > 28 ng/mL or creatine kinase > 240 IU/L within 48 hours postoperative.
- Acute kidney injury (AKI): defined as a serum creatinine level was more than double the baseline value in the first month postoperatively or serum creatinine level ≥ 354 mmol/L at any postoperative time point.
- Cerebralvascular accident (CVA): diagnosed as cerebral hemorrhage or cerebral embolism based on cranial CT scan.
- Prolonged mechanical ventilation: defined as the ventilation time beyond 48 hours.
- Pulmonary infection: defined as cough, sputum, fever (＞38.3℃), white blood cell counts greater than 10×109/L or less than 4×109/L and characteristic changes in chest X-ray.
- Re-thoracotomy: defined as secondary thoracotomy postoperatively due to various reasons.
- Excessive chest drainage: defined as the total amount of postoperative chest drainage was＞1000 mL.
- Mechanical ventilation time: defined as the duration between the end of the operation and extubation.

1. Table S1. Basic characteristics between two groups before matching.

| Variables | Pre-PBM  (n=5006) | Post-PBM  (n=4697) | P value |
| --- | --- | --- | --- |
| **Preoperative characteristics** | | | |
| Age, y | 65（63,69） | 66（63,69） | ＜0.001 |
| Male sex | 3127（62.5） | 3045（64.8） | 0.016 |
| BMI, kg/m2 | 25（23,27） | 25（23,27） | 0.104 |
| EuroSCORE | 4（2,5） | 3（2,5） | ＜0.001 |
| EF, % | 60（57,65） | 59（59,63） | ＜0.001 |
| Previous myocardial infarction | 697（13.9） | 564（12.0） | 0.005 |
| Diabetes | 1250（25.0） | 1144（24.4） | 0.483 |
| Hypertension | 2814（56.2） | 2674（56.9） | 0.476 |
| Hyperlipidemia | 2983（59.6） | 2687（57.2） | 0.017 |
| Chronic lung disease | 109（2.2） | 75（1.6） | 0.036 |
| Renal dysfunction | 53（1.1） | 34（0.7） | 0.08 |
| Previous cardiac surgery | 142（2.8） | 91（1.9） | 0.004 |
| Smoking | 2019（40.3） | 1917（40.8） | 0.629 |
| Hemoglobin, g/L | 133（126,142） | 133（123,144） | 0.744 |
| Hematocrit, l/L | 0.40（0.38,0.42） | 0.40（0.37,0.42） | ＜0.001 |
| Platelets, ×109/L | 194（168,225） | 193（160,232） | 0.06 |
| Creatinine, μmol/L | 82（71,87） | 84（74,96） | ＜0.001 |
| **Operative characteristics** | | | |
| Surgery type |  |  | ＜0.001 |
| CABG only | 2362（47.2） | 1875（39.9） |  |
| Valve surgery only | 1216（24.3） | 1138（24.2） |  |
| CABG＋valve surgery | 569（11.4） | 555（11.8） |  |
| Major aortic surgery | 482（9.6） | 646（13.8） |  |
| Other | 377（7.5） | 483（10.3） |  |
| CPB time, min | 101（81,128） | 109（86,140） | ＜0.001 |

Continuous variables are reported as medians (25th percentile, 75th percentile), categorical variables reported as number (percentage).

BMI: body mass index; CABG: coronary artery bypass grafting; CPB: cardiopulmonary bypass; EuroSCORE: European System for Cardiac Operative Risk Evaluation; EF: ejection fraction.
